# Supplementary material for: Effects of Radiation-Induced Skin Injury on Hyaluronan Degradation and Its Underlying Mechanisms
Source: MDPI journal article supplement (doi:10.3390/molecules28217449), 2023-11-06
Supplement: s1 [file s1]

Table S1. qRT-PCR primers used in this study.

| Target Gene          | Primers        | Sequence (5' → 3')       |
|----------------------|----------------|--------------------------|
| GAPDH (human)        | Forward primer | GGAGCGAGATCCCTCCAAAAT    |
|                      | Reverse primer | GGCTGTTGTCATACTTCTCATGG  |
| GAPDH (mouse)        | Forward primer | TGGCCTTCCGTGTTCTAC       |
|                      | Reverse primer | GAGTTGCTGTTGAAGTCGCA     |
| HYAL1 (human)        | Forward primer | TATGGCCCAAGGCTTTAGGG     |
|                      | Reverse primer | GCTACCACATCGAAGACACTGA   |
| HYAL2 (human)        | Forward primer | GAGCACTACATTCGGACACAG    |
|                      | Reverse primer | GATAACCGGCGATACACATCTT   |
| HYAL3 (human)        | Forward primer | TGGCTGATGCAGGTTTCCAT     |
|                      | Reverse primer | GCGTATCCTCCATCAGTGCA     |
| HYAL4 (human)        | Forward primer | ACGAAGTCTTGAGGAACAATGAG  |
|                      | Reverse primer | TTCCAGACACCGATAGAAGGA    |
| HYAL1 (mouse)        | Forward primer | ACCTGCTTCGCATCTCTACTC    |
|                      | Reverse primer | GGTTGGATACCACGGAACCTC    |
| HYAL2 (mouse)        | Forward primer | GCAGGACTAGGTCCCATCATC    |
|                      | Reverse primer | TTCCATGCTACCACAAAGGGT    |
| HYAL3 (mouse)        | Forward primer | TCTGTGGTATGGAATGTACCCT   |
|                      | Reverse primer | TTTTGGCCGTGAAAATGTTGG    |
| HYAL4 (mouse)        | Forward primer | ATGCAACTATTGCCTGAAGGAC   |
|                      | Reverse primer | GGGCAGGTTTTAGGGATGAGAT   |
| HAS1 (human)         | Forward primer | GAGCCTCTTCGCGTACCTG      |
|                      | Reverse primer | CCTCCTGGTAGGCGGAGAT      |
| HAS2 (human)         | Forward primer | CTCTTTTGGACTGTATGGTGCC   |
|                      | Reverse primer | AGGGTAGGTTAGCCTTTTCACA   |
| HAS3 (human)         | Forward primer | CAGCCTATGTGACGGGCTAC     |
|                      | Reverse primer | CCTCCTGGTATGCGGCAAT      |
| HAS1 (mouse)         | Forward primer | ATGAGGACCCCGCCACTTAT     |
|                      | Reverse primer | CACCTGCGTGTTCTCACCAG     |
| HAS2 (mouse)         | Forward primer | TGTGAGAGGTTTCTATGTGTCCT  |
|                      | Reverse primer | ACCGTACAGTCCAAATGAGAAGT  |
| HAS3 (mouse)         | Forward primer | CAATCGCCAGGAAGATACCTAC   |
|                      | Reverse primer | GGAAATTGCTACGCCACACAA    |
| MEKK2 (human)        | Forward primer | CCCCAGGTTACATTCCAGATGA   |
|                      | Reverse primer | GCATTCGTGATTTTGGATAGCTC  |
| MEKK2 (mouse)        | Forward primer | ATGCTCAGCTCTCAATAGTA     |
|                      | Reverse primer | ATGCGTAACTATTCAAGCAT     |
| MEKK3 (human)        | Forward primer | GGCGAATTATAGCGTTCAGCC    |
|                      | Reverse primer | GGGACAACAGCAATATCCTAAGG  |
| MEKK3 (mouse)        | Forward primer | ATGTGAAGCTTGGGGATTTTG    |
|                      | Reverse primer | TGGTTAGACTCACTGGTCAGAGAC |
| MEK5 (human)         | Forward primer | TCTGCCTGAAGCAACAACACTAC  |
|                      | Reverse primer | GCCATGTATGTTCCGTTCCC     |
| MEK5 (mouse)         | Forward primer | GCCGCTGCAGATATTTCCAA     |
|                      | Reverse primer | CAGCCCGTGTATTACCTTCA     |
| ERK5 (human)         | Forward primer | CCTGAAGCCTACTGTGCCCTATG  |
|                      | Reverse primer | CCGAAGCAGCTGGTACAGGAA    |
| ERK5 (mouse)         | Forward primer | TGAACCCAGTGCCCGAAT       |
|                      | Reverse primer | GGCGCAATCAGGCTCATC       |
| IL-1 $\beta$ (human) | Forward primer | ATGATGGCTTATTACAGTGGCAA  |
|                      | Reverse primer | GTCGGAGATTCGTAGCTGGA     |

| Target Gene           | Primers        | Sequence (5' → 3')      |
|-----------------------|----------------|-------------------------|
| IL-1 $\beta$ (human)  | Forward primer | GAAATGCCACCTTTTGACAGTG  |
|                       | Reverse primer | TGGATGCTCTCATCAGGACAG   |
| IL-6 (human)          | Forward primer | ACTCACCTCTTCAGAACGAATTG |
|                       | Reverse primer | CCATCTTTGGAAGGTTGAGGTTG |
| IL-6 (mouse)          | Forward primer | GCCTTCTTGGGACTGATGCT    |
|                       | Reverse primer | GGTCTGTTGGGAGTGGTATCC   |
| TNF- $\alpha$ (human) | Forward primer | CCTCTCTCTAATCAGCCCTCTG  |
|                       | Reverse primer | GAGGACCTGGGAGTAGATGAG   |
| TNF- $\alpha$ (mouse) | Forward primer | GAGAAGGGGGACCAACTCAG    |
|                       | Reverse primer | CTCCAAAGTAGACCTGCCCCG   |
| CD44 (human)          | Forward primer | GGAGGGCAGCACTGTTTTTG    |
|                       | Reverse primer | GCCACAAAGGACTTGCCAAG    |
| SOD (human)           | Forward primer | GGTGGGCCAAAGGATGAAGAG   |
|                       | Reverse primer | CCACAAGCCAAACGACTTCC    |
| CAT (human)           | Forward primer | TGGAGCTGGTAACCCAGTAGG   |
|                       | Reverse primer | CCTTTGCCTTGGAGTATTTGGTA |
| OH-1 (human)          | Forward primer | GCTCAACATCCAGCTCTTTGAGG |
|                       | Reverse primer | GACAAAGTTCATGGCCCTGGGA  |
| IL-8 (human)          | Forward primer | TAGCCAGGATCCACAAGTCC    |
|                       | Reverse primer | GCTTCCACATGTCCTCACAA    |
| MCP-1 (mouse)         | Forward primer | CAGCCAGATGCAATCAATGCC   |
|                       | Reverse primer | TGGAATCCTGAACCCACTTCT   |
