# Supplementary material for: Effects of Radiation-Induced Skin Injury on Hyaluronan Degradation and Its Underlying Mechanisms
Source: MDPI journal article supplement (doi:10.3390/molecules28217449), 2023-11-06

HaCaT WB original image

MMP9

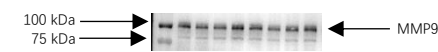

CD44

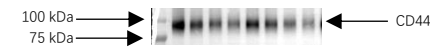

HAS2

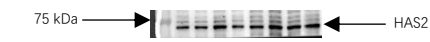

GAPDH

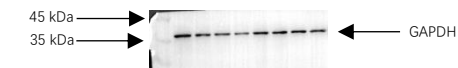

MMP2

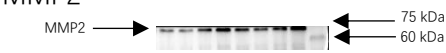

HYAL2

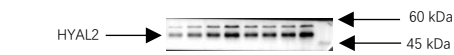

GAPDH

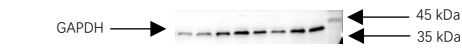

C57BL/6J WB original image

MMP9

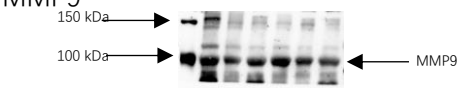

CD44

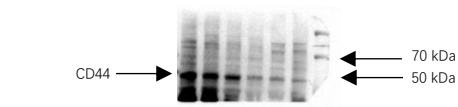

GAPDH

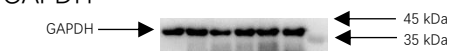

HAS2

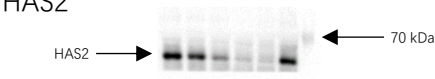

HYAL2

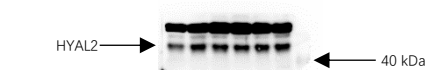

GAPDH

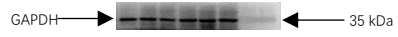

Supplement: s1 [file s1]
